# Supplementary material for: Unique microglia expression profile in developing white matter
Source: PubMed Central journal article supplement (PMC6604453; doi:10.1186/s13104-019-4410-1), 2019-07-01
Supplement: 13104_2019_4410_MOESM1_ESM.pdf [file 13104_2019_4410_MOESM1_ESM.pdf]

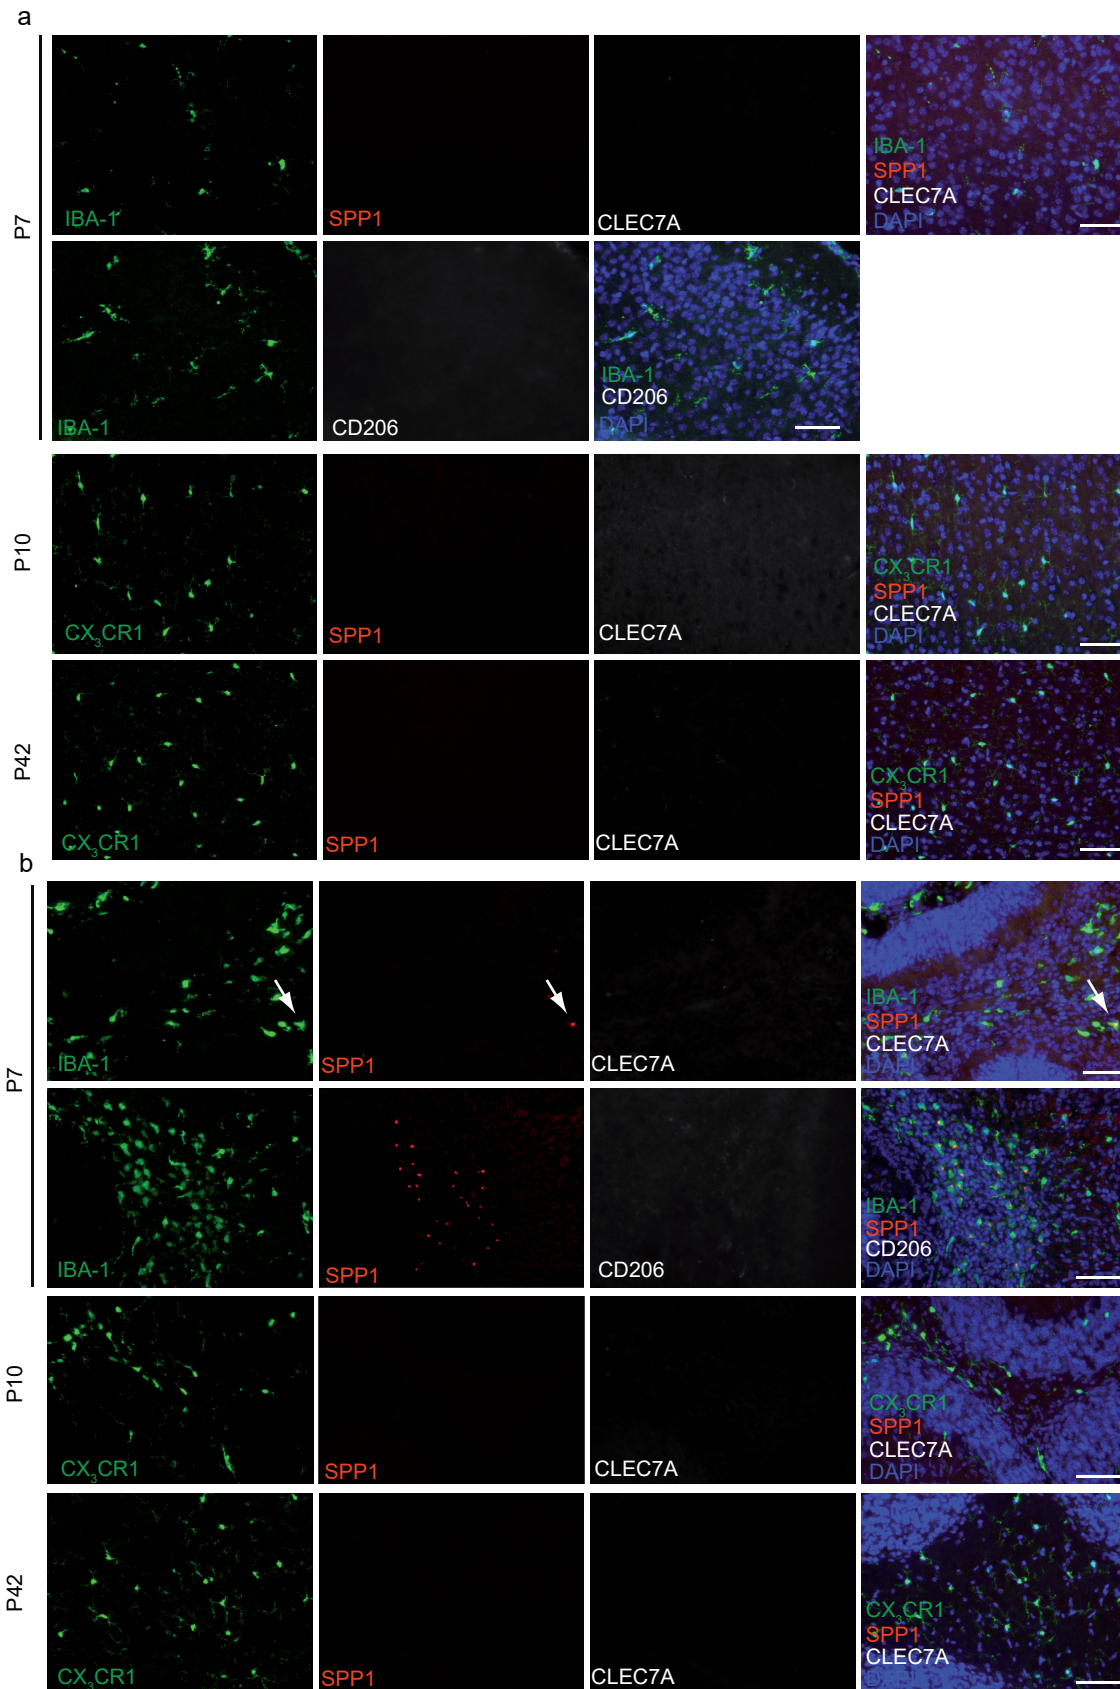

Additional Figure 1
